# Supplementary material
Source: Springer Nature journal article supplement (https://www.springermedizin.de/resource/supplementary/13063_2012_1399_MOESM2_ESM.pdf/9620500)

## Additional File 2 Overview of Delphi process

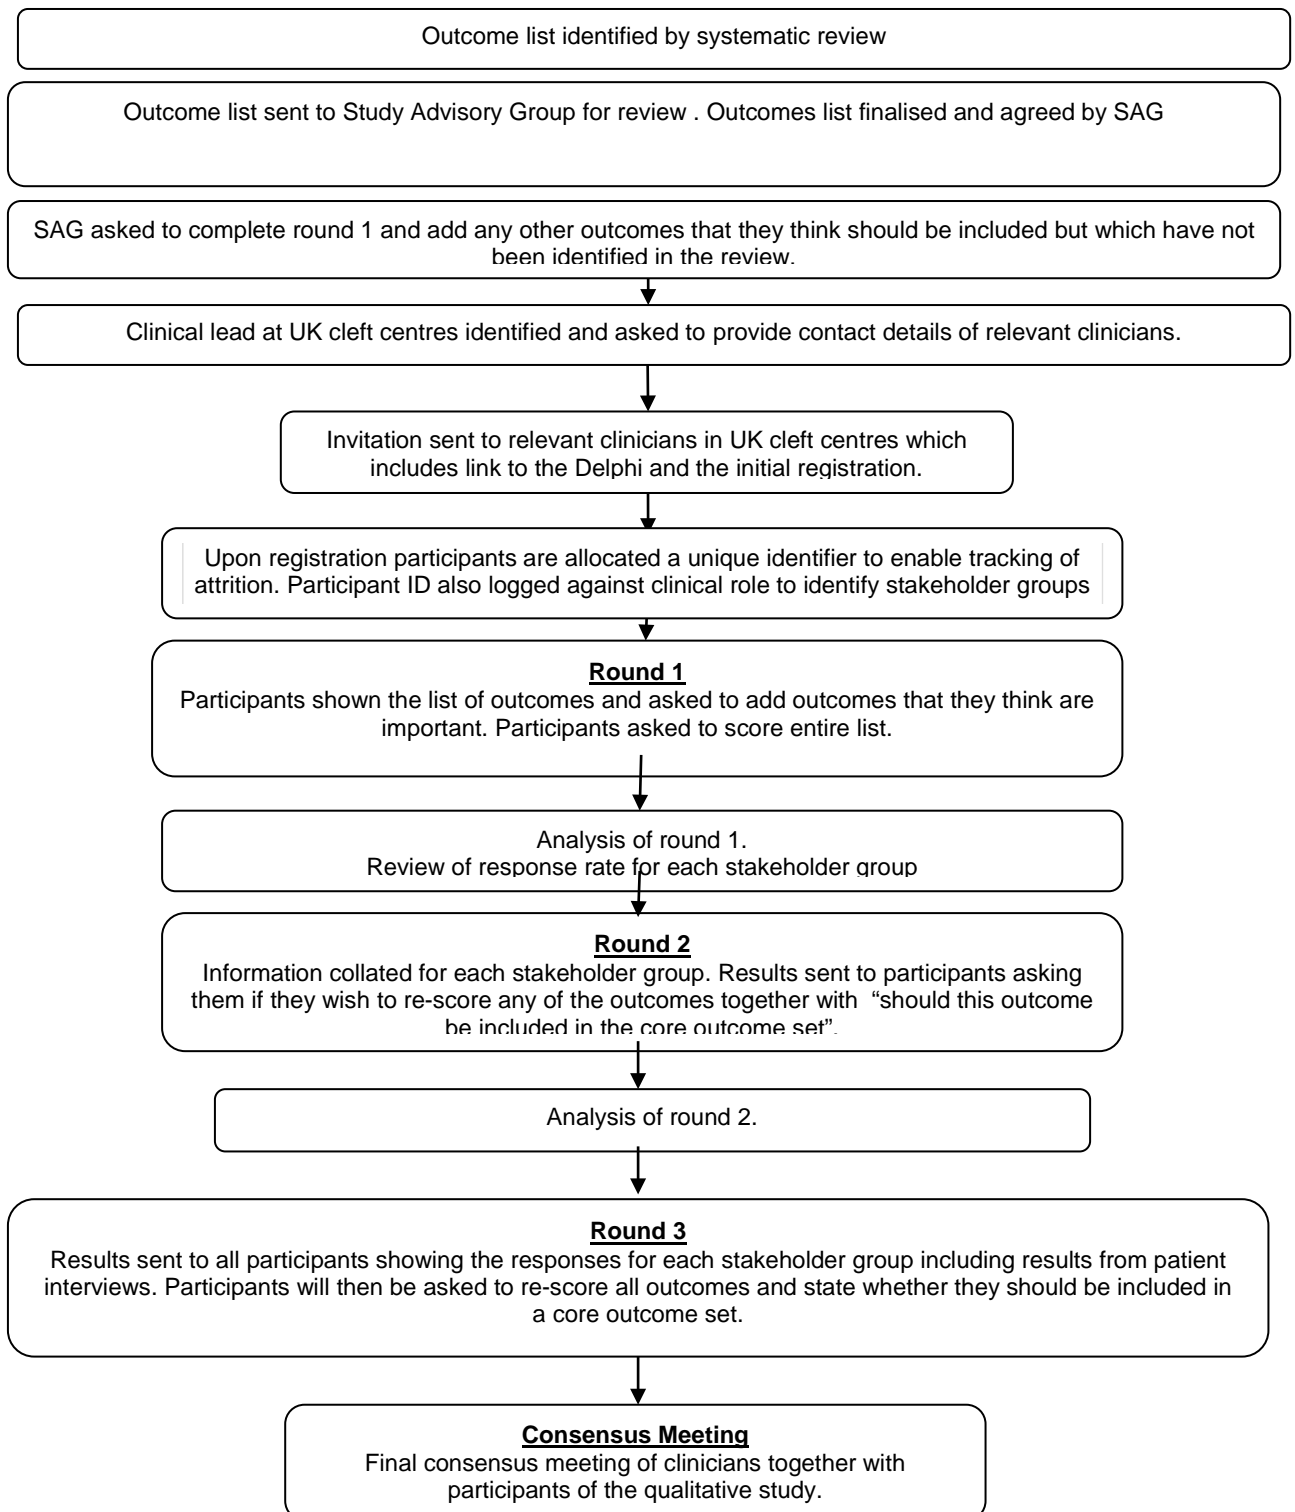

Supplement: MOESM2 [file 9620500]
